# Supplementary material for: Radiolytic stability ofN,N-dialkyl amide: effect on Pu(iv) complexes in solution
Source: Royal Society of Chemistry journal article supplement (doi:10.1039/c7dt03447d), 2017-11-28
Supplement: c7dt03447d1.pdf [file c7dt03447d1.pdf]

### Effect of ionizing radiation on Pu(IV)-monoamides complexes in solution

Drader, J. A., Boubals, N., Camès B., Guillaumont D., Guilbaud, P., Saint-Louis, G. and Berthon, L.\*,  
CEA, Nuclear Energy Division, Research Department on Mining and fuel Recycling Processes, BP17171, F-30207 Bagnols-sur-Cèze, France

#### Supporting Information

Table SI.1. Composition analysis of organic solutions contacted with a 5 mol.L<sup>-1</sup> HNO<sub>3</sub> aqueous phase after gamma irradiation determined by GC-FID for DEHBA and DEHiBA. (EHiBA/EHBA: compound A)

| Integrated dose<br>(MGy) | DEHiBA solutions                  |                                    | DEHBA solutions                  |                                   |
|--------------------------|-----------------------------------|------------------------------------|----------------------------------|-----------------------------------|
|                          | [EHiBA]<br>(mol.L <sup>-1</sup> ) | [DEHiBA]<br>(mol.L <sup>-1</sup> ) | [EHBA]<br>(mol.L <sup>-1</sup> ) | [DEHBA]<br>(mol.L <sup>-1</sup> ) |
| 0                        | 0                                 | 1.34                               | 0                                | 1.36                              |
| 0.75                     | 0.13                              | 0.97                               | 0.14                             | 1.05                              |

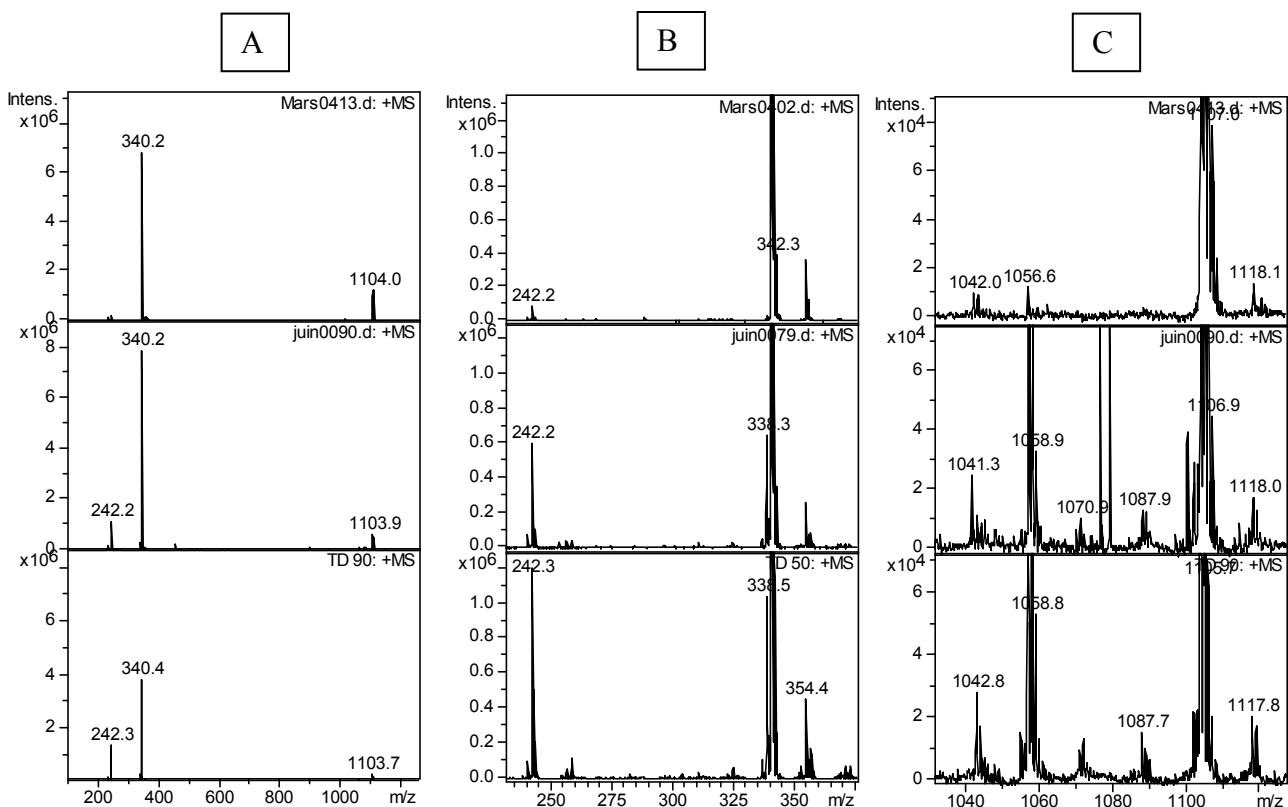

Figure SI.1 ESI-MS spectra of the Pu-DEHDMBA (extraction) organic phase solution at different dose measurements. Top: day 1, 0 kGy; middle: day 88, 554 kGy; bottom: day 130, 819 kGy. Group A: full 200-1200 m/z mass range; trap drive 90, skimmer voltage 50 V, positive ionization mode. Group B: 240-370 m/z mass range, trap drive 50, skimmer voltage 30 V, positive ionization mode. Group C: 1040-1120 m/z mass range, trap drive 90, skimmer voltage 50 V, positive ionization mode. Dilution 1/30 in acetonitrile.

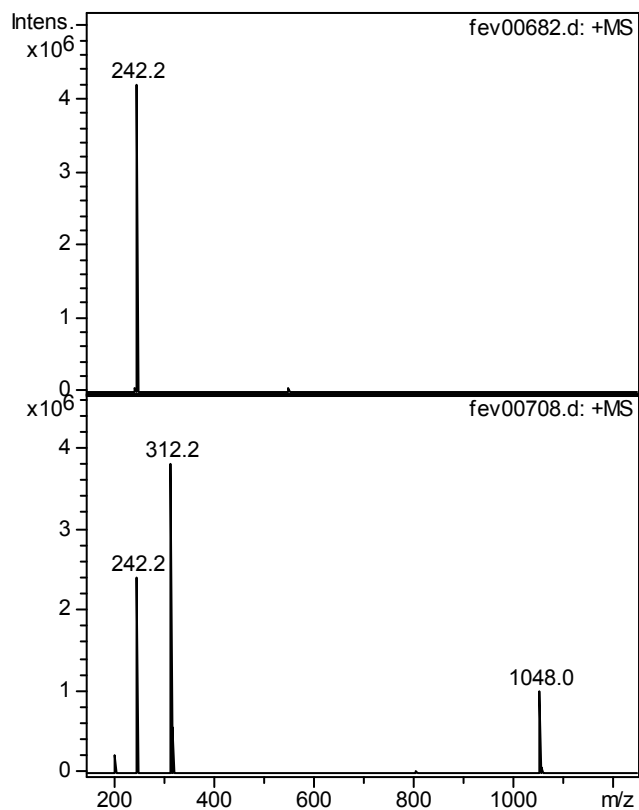

| Species                                                             | m/z    |
|---------------------------------------------------------------------|--------|
| B2EHA (Compound C)                                                  | 242.2  |
| DEHBA                                                               | 312.2  |
| Pu(DEHBA) <sub>2</sub> (NO <sub>3</sub> ) <sub>3</sub> <sup>+</sup> | 1048.0 |

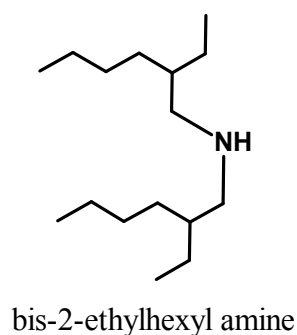

Figure SI.2. ESI-MS spectra of Pu-B2EHA (top) and Pu with a mixture of B2EHA (shown in the figure) and DEHBA. Initial conditions: (top) 5.0 mmol.L<sup>-1</sup> Pu, 5.0 mmol.L<sup>-1</sup> B2EHA, 0.4 mol.L<sup>-1</sup> HNO<sub>3</sub>, acetonitrile media; (bottom) 5.0 mmol.L<sup>-1</sup> Pu, 2.5 mmol.L<sup>-1</sup> B2EHA, 2.5 mmol.L<sup>-1</sup> DEHBA, 0.4 mol.L<sup>-1</sup> HNO<sub>3</sub>, acetonitrile media. ESI-MS instrument settings: trap drive 90, skimmer voltage 40 V, positive ionization mode, 1/10 dilution in acetonitrile.

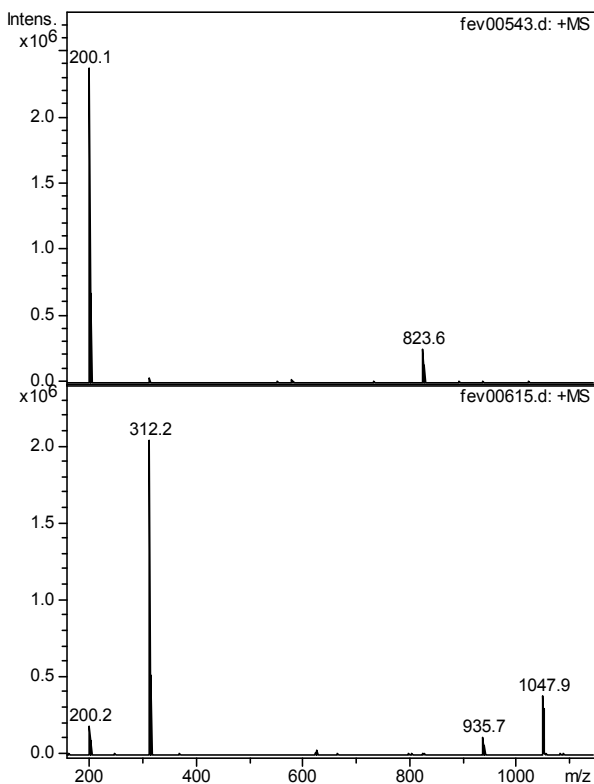

|                                                         |        |
|---------------------------------------------------------|--------|
| EHBA(compound A)                                        | 200.1  |
| DEHBA                                                   | 312.2  |
| $\text{Pu}(\text{EHBA})_2(\text{NO}_3)_3^+$             | 823.6  |
| $\text{Pu}(\text{EHBA})(\text{DEHBA})(\text{NO}_3)_3^+$ | 935.7  |
| $\text{Pu}(\text{DEHBA})_2(\text{NO}_3)_3^+$            | 1047.9 |

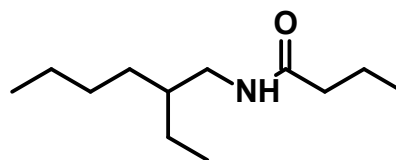

N-2-ethylhexylbutyramide

Figure SI.3. ESI-MS spectra of Pu-EHBA (top) and Pu with a mixture of EHBA (shown in the figure) and DEHBA. Initial conditions: (top) 5.0 mM Pu, 5.0 mM EHBA, 0.4 M  $\text{HNO}_3$ , acetonitrile media; (bottom) 5.0 mM Pu, 2.5 mM EHBA, 2.5 mM DEHBA, 0.4 M  $\text{HNO}_3$ , acetonitrile media. ESI-MS instrument settings: trap drive 90, skimmer voltage 30 V, positive ionization mode, 1/10 dilution in acetonitrile. Table with species and associated m/z values included.
